# Supplementary material for: A deep microfluidic absorbance detection cell replicated from a thickly stacked SU-8 dry film resist mold
Source: Royal Society of Chemistry journal article supplement (doi:10.1039/c2ay26099a), 2012-01-01
Supplement: c2ay26099a.pdf [file c2ay26099a.pdf]

**Supporting Information for:**

## **Deep Microfluidic Absorbance Detection Cell Replicated from Thickly Stacked SU-8 Dry Film Resist Mold**

**Daisuke Onoshima,<sup>a</sup> Jun Wang,<sup>b</sup> Michihiko Aki,<sup>c</sup> Kenji Arinaga,<sup>c</sup> Noritada Kaji,<sup>a,d</sup>**

**Manabu Tokeshi,<sup>a,e</sup> Shozo Fujita,<sup>c</sup> Naoki Yokoyama<sup>c</sup> and Yoshinobu Baba<sup>a,d,f</sup>**

<sup>a</sup> *FIRST Research Center for Innovative Nanobiodevices, Nagoya University, Nagoya, 464-8603, Japan.*

<sup>b</sup> *Department of Chemistry and Molecular Biology, University of Gothenburg, Göteborg, Box 462, Sweden.*

<sup>c</sup> *Fujitsu Laboratories Ltd, Atsugi, 243-0197, Japan.*

<sup>d</sup> *Department of Applied Chemistry, Graduate School of Engineering, Nagoya University, Nagoya, 464-8603, Japan.*

<sup>e</sup> *Division of Biotechnology and Macromolecular Chemistry, Faculty of Engineering, Hokkaido University, Sapporo, 060-8628, Japan.*

<sup>f</sup> *National Institute of Advanced Industrial Science and Technology (AIST), Takamatsu, 761-0395, Japan.*

### **SI Guide**

This file contains supplementary Figure S-1 about a microscopic fluorescence observation inside deep PDMS microchannels. Fluorescein isothiocyanate (FITC) (Sigma-Aldrich) solution was used to see changes in fluorescence. The observation was made with Nikon Eclipse TE300.

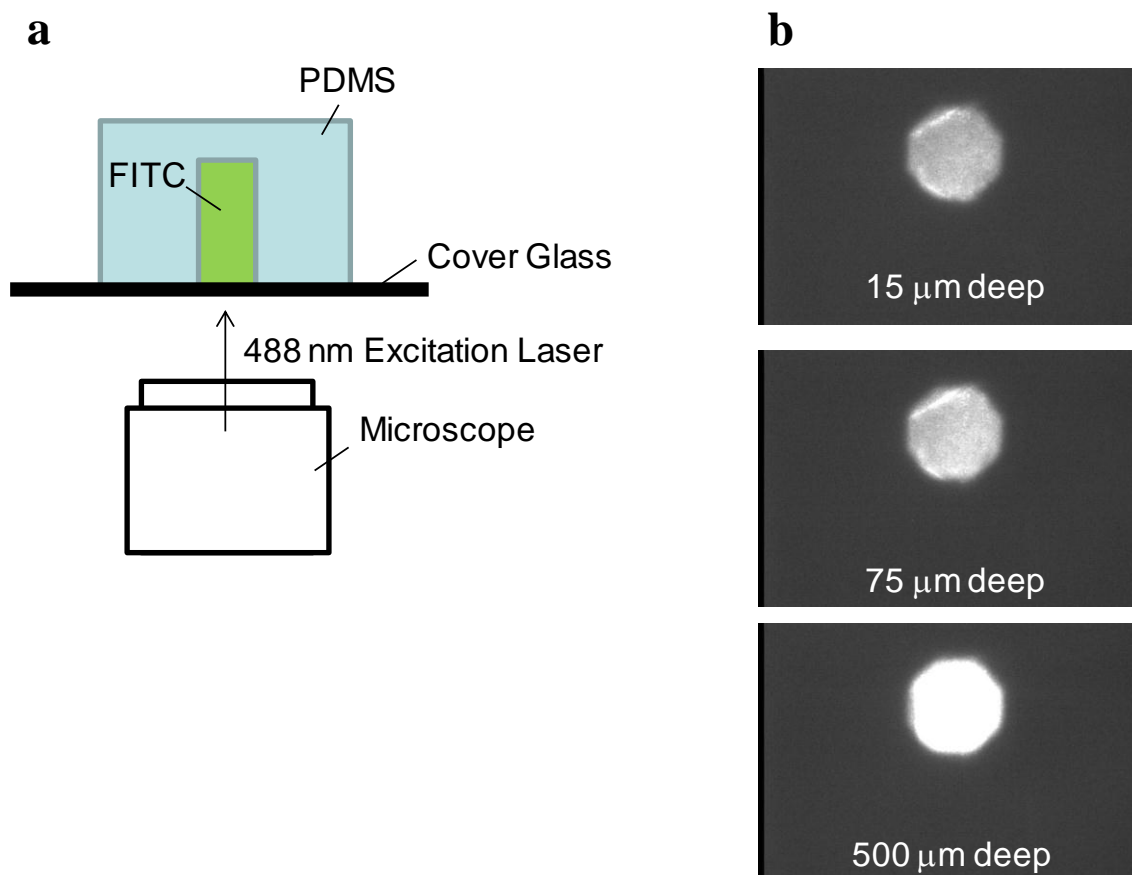

**Figure S-1:** Fluorescence experiment with deep PDMS microchannel. (a) Schematic illustration of the setup. (b) Obtained fluorescent images of 10 nM FITC solution.
